# Supplementary material for: Niemann–Pick Type C2 Proteins in Aedes aegypti: Molecular Modelling and Prediction of Their Structure–Function Relationships
Source: MDPI journal article supplement (doi:10.3390/ijms25031684), 2024-01-30
Supplement: s1 [file s1]

**Supplementary Information**  
**to**  
**Niemann–Pick Type C2 Proteins in *Aedes aegypti*: Molecular Modelling**  
**and Prediction of Their Structure–Function Relationships**

**Prathigna Jaishankar Thambi <sup>1</sup>, Cassandra M. Modahl <sup>2,3,4,\*</sup> and R. Manjunatha Kini <sup>2,5,6,\*</sup>**

1 King's College London, London SE1 1UL, UK; prathignathambi@gmail.com

2 Department of Biological Sciences, Faculty of Science, National University of Singapore, Singapore 117543, Singapore

3 Centre for Snakebite Research and Interventions, Liverpool School of Tropical Medicine, Liverpool L3 5QA, UK

4 Vector Biology Department, Liverpool School of Tropical Medicine, Liverpool L3 5QA, UK

5 Department of Pharmacology, Yong Loo Lin School of Medicine, National University of Singapore, Singapore 117600, Singapore

6 Department of Biochemistry and Molecular Biology, VCU School of Medicine, Virginia Commonwealth University, Richmond, VA 23298, USA

\* Correspondence: cassandra.modahl@lstmed.ac.uk (C.M.M.); dbskinim@nus.edu.sg (R.M.K.)

## Supplementary Figures

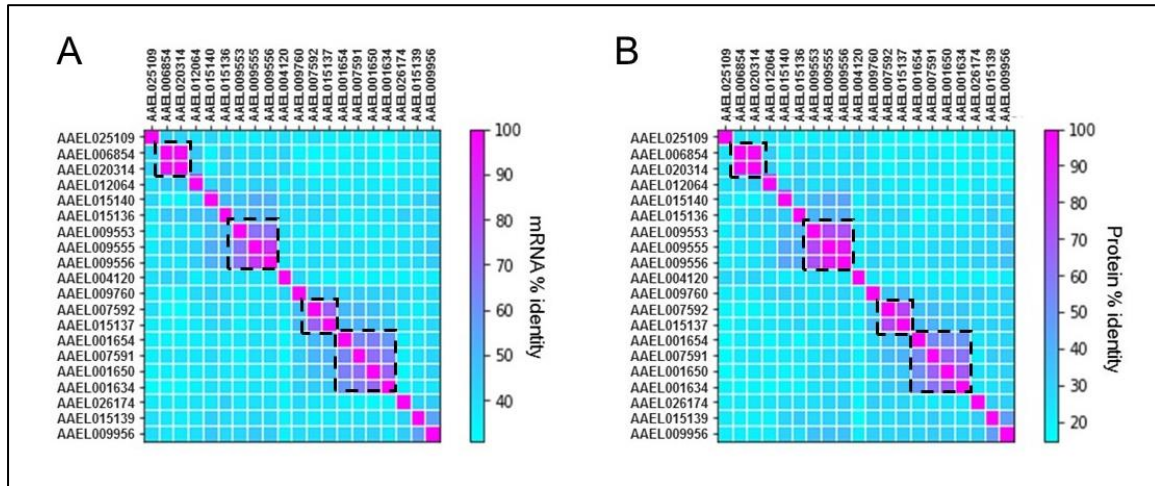

**Figure S1. Sequence identity of *A. aegypti* NPC2 mRNA and mature proteins.** The heatmaps depict the mRNA (A) and protein (B) identity (%) of 20 *A. aegypti* NPC2. Four set of genes - (AAEL006854 and AAEL020314), (AAEL009553, AAEL009555 and AAEL009556), (AAEL001654, AAEL007591, AAEL001650, and AAEL001634) and (AAEL007592 and AAEL015137) form clusters of high identity on the heatmap and are marked with black dotted boxes.

|            | AAEL007592 | AAEL007591 | AAEL015137 | AAEL015139 | AAEL009956 | AAEL026174 | AAEL015136 | AAEL015140 | AAEL025109 |
|------------|------------|------------|------------|------------|------------|------------|------------|------------|------------|
| AAEL007592 |            | 37.33      | 77.63      | 25.5       | 29.05      | 28.08      | 26.53      | 21.48      | 15.15      |
| AAEL007591 | 51.43      |            | 41.06      | 30.41      | 32.65      | 21.92      | 24.49      | 22.97      | 13.64      |
| AAEL015137 | 73.64      | 52.85      |            | 29.14      | 30.67      | 29.25      | 29.05      | 23.84      | 15.04      |
| AAEL015139 | 39.96      | 42.67      | 40.96      |            | 47.33      | 30.61      | 30.61      | 28.00      | 21.97      |
| AAEL009956 | 41.03      | 44.7       | 44.25      | 56.07      |            | 30.14      | 25.85      | 30.00      | 18.18      |
| AAEL026174 | 36.05      | 34.85      | 36.91      | 38.02      | 41.69      |            | 26.21      | 26.71      | 18.37      |
| AAEL015136 | 40.33      | 38.21      | 41.22      | 41.78      | 45.11      | 45.66      |            | 31.76      | 17.56      |
| AAEL015140 | 40.32      | 39.22      | 40.67      | 38.48      | 41.47      | 39.69      | 49.66      |            | 23.13      |
| AAEL025109 | 39.02      | 35.51      | 38.05      | 40.23      | 39.76      | 37.03      | 35.32      | 40.55      |            |

**Figure S2. Sequence identity among nine NPC2 genes forming a large cluster in chromosome 1.** The lowest percentage identity in mRNA (Red) is about 35%, whereas it is about 14% in proteins (Blue). NPC2 expressing low identity are marked in green boxes, whereas the high percentages are marked in purple boxes. Despite their presence in a cluster, only two NPC2, AAEL007592 and AAEL015137, show >73.5% identity, while all others show poor similarity.

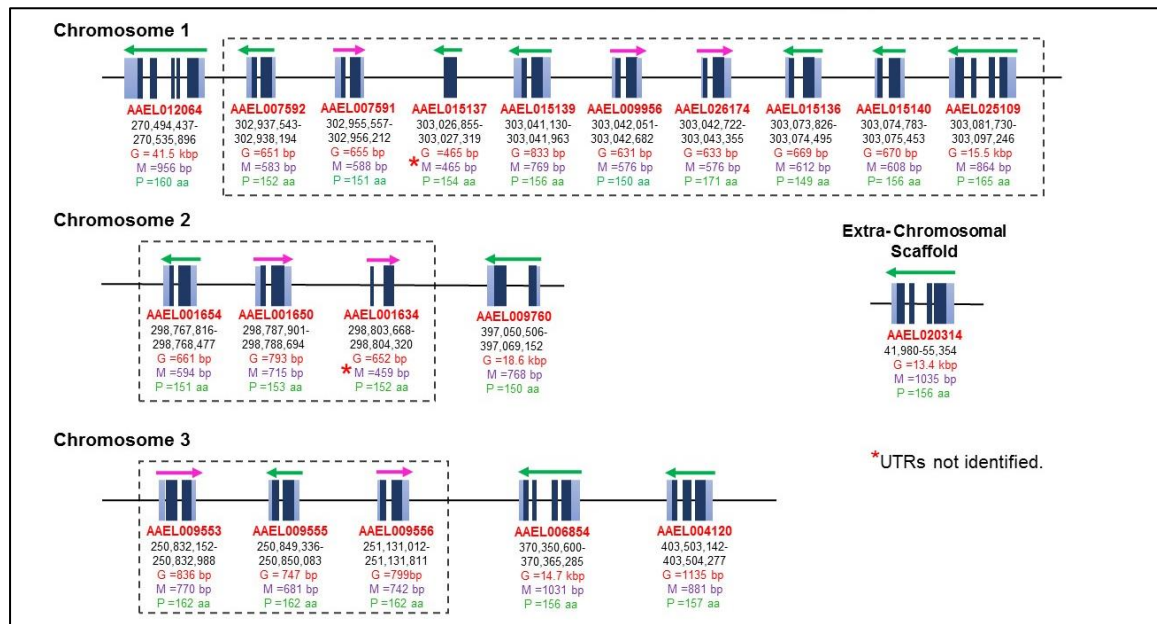

**Figure S3. Intron-exon structure, orientation, location and sizes of gene, mRNA and full-length protein of *A. aegypti* NPC2 genes.** Intron-exon profiles for each gene is indicated with blue boxes, exons (dark blue boxes), introns (gaps between boxes), and 5' and 3' UTRs (light blue boxes). The UTRs of some genes (\*) have not been identified. The chromosome location, and sizes of gene (G), mRNA (M) and protein (P) are indicated in appropriate units of base pairs and amino acid residues. The direction of transcription is shown above each gene.

```

AAEL009531      QD-----GHHCMVYGVQNY-IGMHKQNCPTTEKAPLDNLQEEILKRCR-GFVFEDEK---MPLCCNYEQLLELNNFNKGGVFGRCCTCTRMLYS
AAEL019883      QSTTQAADTGGGTGSPSTPDRGGGGGQDHYGVQNNETALTSTQYCSYDGPAPKAST-ITQDLKWC-KHLLADEDGNVAVTCCDAEQVQILANNVKLANFLARCPSCMANLVRH
NP_000262.2      QS-----CWYSGGIAYGKRYNCEYSGPKPFLPK-DGYDLVQLCPGFFGN-----VSLCCDVRQLQLKDLQLFLQLSRCPSCFYNNLNL

AAEL009531      ICHMAQNPQERFLTAHTASEGV-----YVDKVDYRIAREH/QNVYDSCWVILPSSGKYAMDMACGGHSTRCTARZWFEYLGDAVNDYVPMEIYH-VPEDPDIRY--NQD
AAEL019883      MCDFTONPKHSFLEV-KATEQM-----DNTKHEYITEIDHIMEQYMGNTYSSCSQSVFTGQLALLMCSGNGASRCARWFFNMGTKEGNYVFPQINYIARQSSNDASFTPLKPR
NP_000262.2      FCLTCSFRQSGFLNV-TATDSDVPTNQTKIN/KELQYVVGQSFANAMYNACRDVEAPSSNDKALGLCGK-DADACNATNIEMFNK-DNGQAPTITPV-PSDFVHMEPMINA

AAEL009531      VLHNEPINC-SNSCSVDCTSDCPVSDPFAEDPCHVGLDNEVTVWVITLGGFLSNVLSGT-----KNGSSFEFT-----KFGDGF
AAEL019883      IVCPSKLDKTPACSCICDASCPSPAPADPPQPVIVYDGVAVVMEVF-----LVCSGLFVIGACIQSGSGNAGELVFGDTHSLDSTVGRLAGGLSNGLDGTREDS
NP_000262.2      TKGCDSEVDENAPCSQCDQSVICGKFPQPPPPAPWTILGLDAMYVDMITDAILL-----VFFGAFF-----AVWCYR-KRVFVSEYTP--IDSN-----AFS-----

AAEL009531      -----AVNRGLIKFTTHWGTFCAMHPLVLIATCSWVGLCYGIIHLQITTDVFLWAAPESRSKVEKDYFDSRFSFFYRTIQMF
AAEL019883      FLQSKRSSATWDGQELRHHNTINGDDAESEYFERLAKETALEKEFTAWSTICAKHPIVLLGLLEIVMGSGINFLHITINPVELRASPNSRRLEPEVFDSHTEFFYRLEQLI
NP_000262.2      -----VNASKGEASCDPVSAFTECLARLFTWGSFCVNRPCVITFLVITITACSSSLVFWVITINPVLASAPSSQALCKEYVTDQHPFPFFRTEQLI

AAEL009531      IKPTKQNYIHE-----TIGNITFGPAFDKEFLAVFELQSQIEQI-----QGEAGALEKICVAPMTAAQ-QEIVLSECTIQSVFGYFQNDYDNHSHVRPDEGGFVINYINKINDCTRNA--
AAEL019883      IKAEINLNVNHN--TENGVIIEFGPVNMQFLDDIFELQESIKKIEATADNRTIGLQDICTARLTAEVRGPTQTEDCVQSLMGVFGDDIDTFDAEDDEGGFVITYLDKLMQCFGNF--
NP_000262.2      ITRAPLTKRHT-----GADLVFFGFLDIQLHLHQVLDLQIATENITAS-YINSETVLQDICIARLSPYNT-----NCTILSVINYFQNSHSLDHKKGDS-----DYHTHFLVCVRAPAS

AAEL009531      -----YIPACFGPYGGPVEPGIAGVGFKKALGE-SFOYRATGVIIITFLINKA-NKDELGPMMWEKKYIEFIEKYQNPMDIATASERSIEQIDAMSEAMYTVIISYVVMFYV
AAEL019883      -----YNECLAPYGGPVDPAIALGGIPQASAEVKKKYNANAVILITLVNHYH-DKSKLSAALTWEESYVAFMKNWTKANMSIAFTSERSIEDELRESQSDVSTILVSYIMFAY
NP_000262.2      INDTSLLDHP-CLGTFGGPPVFWLVGGVD-----DQYNNATALLITFPNNYINDUTSKLQRAQWKEKEINFRKNYNANLITSTASERSIEDELRESQSDVFTVVISYAIMFLY

AAEL009531      ITISLQKVSQGTFFNESKILAVUGGIVVVLVSACSLGFGVYLQIATMLTIEVIFPVLAVGVNIFMLVHAFQRIKRVQTPETDKAIGKALGQIGPSILLTASAECCCFAGIGLSIM
AAEL019883      IAVSLGVNQRSLALDSKITLGLGVIVLASVASVGI FGYIGLPTLITVEVIFPVLAVGVNIFILVQTHQROTKGTEHABHIGRILGRVGPSILLTAVSESCCFAGIGLSIM
NP_000262.2      ISIALGHMKSCRLILVDSGLAGLIVLSSVACSLGFGSYIGLPLTILVIEVIFPVLAVGVNIFILVQVAYQDRDLQGETLQQLGRLVGEVAPMSFLSSPSETVAFFLGALSVM

AAEL009531      PAVNTFANVATVALFVDFVLQITAFVAMALDERVASGRLLDLCVVSKEKRV-----GNEQIGLESFFKYYAPFIMKPVRLTILAIPIVLSLSLMVPNVEPGLDQELSMGDSHL
AAEL019883      PAVRFAALVAGGLLIDFLQITCFVSLALDTPARQANRYDVLFLRGSKKQVVPVNAKE-GLLYKFKSYIVPFDQKPIRVGMVWFFGLCWISVAPHIDIGLDQELSMGDSFV
NP_000262.2      PAVHTFSLFAGLAVTIDFLQITCFVSLGLDIKQKQNRLLDIFCCVGAEGDTSVQASES-CLFRFFKNSYFLLLDKMMRPVIALFVGVLSFSIANVINKVDIGLDQELSMGDSFV

AAEL009531      VKYFQMAELLNMPPPVYVFLKPLAVTSVQDNLVGGTMCNADSVQTLHLSAPYEITRARPSSWLDVVDWLAI-DQCCFNRIDGSCFLSNH--FCESCPREEDETGTVRVTV
AAEL019883      LKVFYVLGVLSTGPPMVYVKSGLNYSGQDNLICGGQCNLDLSLQVYIASKRPTETIYARASWLDVMDMSAASDCCR-QFGNGSCPHENMT--CDKCSNLTSMN-RPTE
NP_000262.2      VDYFKISQYLHAPPPVFLLESGHYTSKQNMVCGGQGNIDSLVQQIFNAALQDNYTRIGFAPSSWIDVYDWKFGSCCCRVNITDQFCNASVVDPAVCRCRPLTPEGKQRPQS

AAEL009531      EQFERMEFFLSDIPDDRCAKAGRAAVLITANVVDISAGIN-VHDSYMTVHTIVVSRDFEYALEWARKITDIOQMLDEK-----GAG-----VEIFPYSVYVFFVEQYLTIINGDAL
AAEL019883      PSFRVYVSPFLQMPDPSCAKAGRAAYQWNLQKQIATYVDGAPYAPHTILTKSSVFEALRSARKVANTITTIHARLLEGRSEIQQVEVFPYVFFVEQYLTIINGDAL
NP_000262.2      GDMRFLTIDSDNWKHKGCGHAYSSA/NL-----LLSGHTKVGATYMTHTVLQTSADFIDALKARLIASNVETMGIN-----GSA-----YRVFPYSVYVFFVEQYLTIIDOTT

AAEL009531      LSLGLSLAAVFTVTLGLDVFSLILVLMVFLILNMGFPMWANSITINAVSLVNLMSVGI GVEFISHTVRSYK-NEAGSKVERAAELTKTGSSVFGITILKFKAGIWLAFANSQ
AAEL019883      KMEIIVLAITVITFLMGFDIHSVWVWITITMIVINIGLMYHWNISINAVSLVNLMAVGI SVEFCSHL/HSPVSLSEETREKRAADALITMGSSVFGITILKFKGGLVLGFAQSQ
NP_000262.2      FNLGSLGAFILVWTLSCLENGAVIMCATLAWLVNMFQVNLWGISINAVSLVNLMSGGISVEFCSHITRAFTVMGDSRVERAEALAHGSSVFGITILKFKGGLVLAFAQSQ

AAEL009531      IFQIFYFMYLGI VLI GAHGLVLLPVLSYIGP-----RSTKQVLIIRATT-----DPLSEAKYSA-----
AAEL019883      IFQIFYFMYLGI VLI GAHGLVLLPVLSYIGP-----RSTKQVLIIRATT-----DPLSEAKYSA-----
NP_000262.2      IFQIFYFMYLGI VLI GAHGLVLLPVLSYIGP-----RSTKQVLIIRATT-----DPLSEAKYSA-----

AAEL009531      -----CHWQEQEQRRREQQPALCKQQQQSYSTIGTGGHQQQQQRLPHVQHDTRAFVHSEAYEQLEHLQPSKSKSPTRHVPVGSITGSPKSPSTQKHQQRKVVVIAVAVPTTAPGD
AAEL019883      -----CHWQEQEQRRREQQPALCKQQQQSYSTIGTGGHQQQQQRLPHVQHDTRAFVHSEAYEQLEHLQPSKSKSPTRHVPVGSITGSPKSPSTQKHQQRKVVVIAVAVPTTAPGD
NP_000262.2      -----CHWQEQEQRRREQQPALCKQQQQSYSTIGTGGHQQQQQRLPHVQHDTRAFVHSEAYEQLEHLQPSKSKSPTRHVPVGSITGSPKSPSTQKHQQRKVVVIAVAVPTTAPGD

AAEL009531      -----SENH--NF-
AAEL019883      DRHVIDDKSVAAVAEQ--VDFD
NP_000262.2      -----TERERLNF-

```

**Figure S4. Sequence alignment of mature *A. aegypti* and *Homo sapiens* NPC1 proteins.** The sequences of mature NPC1 proteins of *A. aegypti* (AAEL009531 and AAEL019883) and *Homo sapiens* (NP\_000262.2) were aligned using Clustal Omega. The six residues of human NPC1 that interact with NPC2 while participating in cholesterol transfer are marked in teal. All of these residues are mutated in *A. aegypti* NPC1 (red dotted boxes).

**A**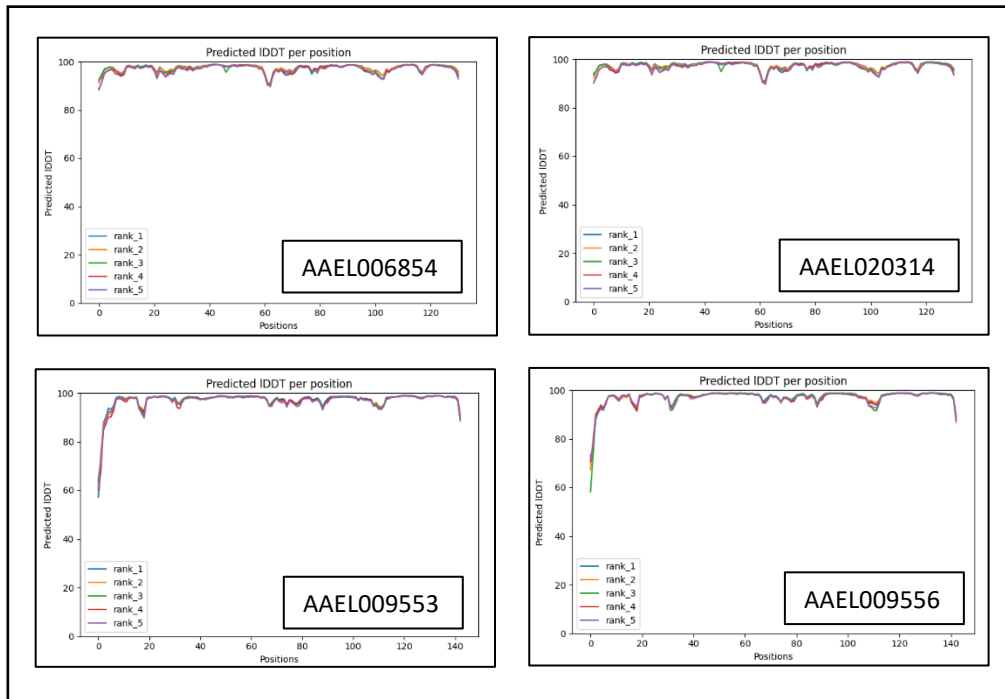**B**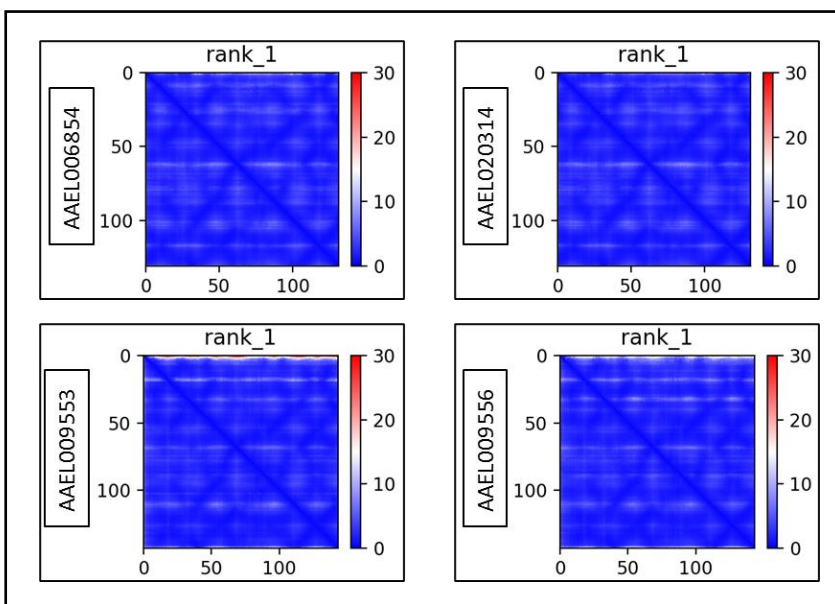

**Figure S5. pLDDT and PAE graphs predicted cholesterol binding NPC2 proteins.** The structures of four potential cholesterol binding *A. aegypti* NPC2 proteins was predicted using AlphaFold2. The top rank, low PAE and high pLDDT structures were concluded as the best models for each protein.

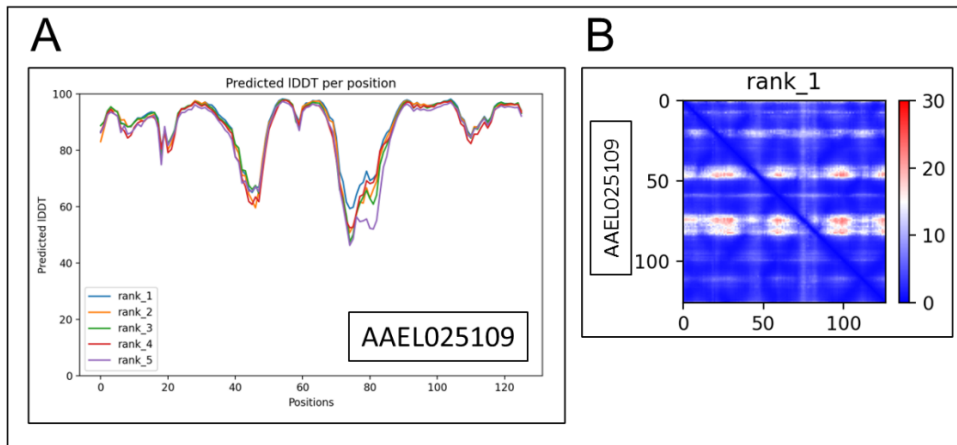

**Figure S6. pLDDT and PAE graphs predicted fatty acid binding NPC2 protein.** The structure of a potential fatty acid binding *A. aegypti* NPC2 protein, AAEL025109, was predicted using AlphaFold2. The top rank, low PAE and high pLDDT structure was concluded as the best model.

## Supplementary Tables

**Table S1. RMSD (all heavy atoms) of four potential cholesterol binding NPC2 protein structures with Apo (1NEP) and cholesterol-bound (2HKA) bovine NPC2.**

|            | Apo-NPC2<br>(Bovine, 1NEP)<br>(RMSD, Å) | NPC2-cholesterol<br>complex<br>(Bovine, 2HKA)<br>(RMSD, Å) |
|------------|-----------------------------------------|------------------------------------------------------------|
| AAEL006854 | 1.168                                   | 0.746                                                      |
| AAEL020314 | 1.138                                   | 0.751                                                      |
| AAEL009553 | 1.123                                   | 1.184                                                      |
| AAEL009556 | 1.181                                   | 1.075                                                      |



**Table S2. RMSD (all heavy atoms) of one potential fatty acid binding NPC2 protein structure with Apo (3WEA) and oleic acid-bound (3WEB) ant NPC2.**

|            | Apo-NPC2<br>(Ant, 3WEA)<br>(RMSD, Å) | NPC2-fatty acid<br>complex<br>(Ant, 3WEB)<br>(RMSD, Å) |
|------------|--------------------------------------|--------------------------------------------------------|
| AAEL025109 | 2.097                                | 2.420                                                  |

**Table S3. Expression of NPC2 genes in tissues of *A. aegypti***

**(A) Expression of NPC2 genes in antenna, brain, proboscis and whole body**

|            | Antenna*   | Brain*     | Proboscis* | Whole Body# |
|------------|------------|------------|------------|-------------|
| AAEL001634 | 0.00       | 0.00       | 0.00       | 0.00        |
| AAEL001650 | 0.00       | 6724.62    | 0.00       | 0.00        |
| AAEL001654 | 0.00       | 325.62     | 0.00       | 0.00        |
| AAEL004120 | 97325.56   | 255785.10  | 10707.65   | 108777.13   |
| AAEL006854 | 1747848.90 | 17104.74   | 171139.30  | 116420.10   |
| AAEL007591 | 0.00       | 0.00       | 0.00       | 39934.75    |
| AAEL007592 | 825.46     | 0.00       | 0.00       | 27754.65    |
| AAEL009553 | 380.90     | 0.00       | 0.00       | 0.00        |
| AAEL009555 | 0.00       | 0.00       | 0.00       | 0.00        |
| AAEL009556 | 0.00       | 397.33     | 0.00       | 14802.48    |
| AAEL009760 | 419.75     | 0.00       | 0.00       | 1257004.01  |
| AAEL009956 | 0.00       | 0.00       | 0.00       | 0.00        |
| AAEL012064 | 53774.53   | 2060221.71 | 2351248.48 | 416319.74   |
| AAEL015136 | 0.00       | 0.00       | 0.00       | 192459.25   |
| AAEL015137 | 0.00       | 0.00       | 0.00       | 0.00        |
| AAEL015139 | 0.00       | 0.00       | 0.00       | 0.00        |
| AAEL015140 | 0.00       | 0.00       | 0.00       | 0.00        |
| AAEL020314 | 685575.39  | 5704.24    | 74437.94   | 87884.96    |
| AAEL026174 | 0.00       | 0.00       | 0.00       | 1745.58     |
| AAEL025109 | 0.00       | 0.00       | 0.00       | 0.00        |

\*Each value is the average of individual sets of 100-220 antenna, 9-18 brain and 275-797 proboscis of Liverpool mosquito strain [1].

#Each value is the average 3 individual whole-body of Liverpool mosquito strain [2].

**(B) Expression of NPC2 genes in midgut**

|            | Day 1*     | Day 4 <sup>#</sup> | Day 14 <sup>§</sup> |
|------------|------------|--------------------|---------------------|
| AAEL001634 | 0.00       | 0.00               | 0.00                |
| AAEL001650 | 365.74     | 1184.16            | 194.51              |
| AAEL001654 | 280.09     | 320.44             | 0.00                |
| AAEL004120 | 336.87     | 195.74             | 659.59              |
| AAEL006854 | 88.65      | 717.35             | 716.79              |
| AAEL007591 | 198676.21  | 252027.37          | 712972.49           |
| AAEL007592 | 26885.00   | 3021.88            | 87141.99            |
| AAEL009553 | 0.00       | 0.00               | 0.00                |
| AAEL009555 | 0.00       | 0.00               | 183.64              |
| AAEL009556 | 162543.71  | 12447.31           | 17460.29            |
| AAEL009760 | 311665.17  | 166901.01          | 664926.92           |
| AAEL009956 | 1887.16    | 161.41             | 844.64              |
| AAEL012064 | 852.68     | 4131.45            | 2686.99             |
| AAEL015136 | 2790862.96 | 1997498.04         | 888536.30           |
| AAEL015137 | 2352.97    | 5564.54            | 9351.43             |
| AAEL015139 | 1152.91    | 0.00               | 1142.74             |
| AAEL015140 | 886.85     | 1776.92            | 190.45              |
| AAEL020314 | 177.40     | 4304.39            | 473.57              |
| AAEL026174 | 49034.14   | 35249.04           | 21863.03            |
| AAEL025109 | 0.00       | 0.00               | 0.00                |

\*Each value is the average of 15 individual midguts of Puerto Rico mosquito strain [3].

<sup>#</sup>Each value is the average of 45 individual midguts of Thailand mosquito strain [4].

<sup>§</sup>Each value is the average of 10 individual midguts of Mexico mosquito strain [5].

**(C) Expression of NPC2 genes in salivary glands**

|            | Day 7* | Day 14*§ | Day 14*§ |
|------------|--------|----------|----------|
| AAEL001634 | 1.04   | 1.69     | 1.91     |
| AAEL001650 | 0.45   | 0.93     | 1.05     |
| AAEL001654 | 0.00   | 0.00     | 0.00     |
| AAEL004120 | 277.74 | 323.26   | 364.30   |
| AAEL006854 | 7.29   | 14.01    | 15.79    |
| AAEL007591 | 0.45   | 0.55     | 0.62     |
| AAEL007592 | 0.00   | 0.00     | 0.00     |
| AAEL009553 | 0.00   | 0.76     | 0.86     |
| AAEL009555 | 0.00   | 0.38     | 0.43     |
| AAEL009556 | 0.45   | 0.38     | 0.43     |
| AAEL009760 | 1.94   | 5.75     | 6.49     |
| AAEL009956 | 0.00   | 0.00     | 0.00     |
| AAEL012064 | 112.44 | 186.06   | 209.75   |
| AAEL015136 | 0.35   | 0.93     | 1.05     |
| AAEL015137 | 0.00   | 0.55     | 0.62     |
| AAEL015139 | 0.00   | 0.00     | 0.00     |
| AAEL015140 | 0.00   | 0.00     | 0.00     |
| AAEL020314 | 0.00   | 0.00     | 0.00     |
| AAEL026174 | 0.00   | 0.00     | 0.00     |
| AAEL025109 | 0.00   | 0.00     | 0.00     |

\*Each value is the average of two independent sets of 20 pairs of salivary glands [6].  
§Performed on two independent days [6].

**Table S4. Differential expression in the midgut infected with CHIKV, DENV1 and DENV2**

**(A) Differential expression of genes in the midgut infected with CHIKV**

|            | Control MG Day 1 * | CHIKV MG 1-dpi* |
|------------|--------------------|-----------------|
| AAEL001634 | 0.00               | 0.00            |
| AAEL001650 | 365.74             | 0.00            |
| AAEL001654 | 280.09             | 0.00            |
| AAEL004120 | 336.87             | 196.51          |
| AAEL006854 | 88.65              | 0.00            |
| AAEL007591 | 198676.21          | 304251.16       |
| AAEL007592 | 26885.00           | 30985.36        |
| AAEL009553 | 0.00               | 0.00            |
| AAEL009555 | 0.00               | 111.09          |
| AAEL009556 | 162543.71          | 114643.93       |
| AAEL009760 | 311665.17          | 427435.53       |
| AAEL009956 | 1887.16            | 2010.28         |
| AAEL012064 | 852.68             | 453.10          |
| AAEL015136 | 2790862.96         | 2695051.43      |
| AAEL015137 | 2352.97            | 3611.56         |
| AAEL015139 | 1152.91            | 1061.27         |
| AAEL015140 | 886.85             | 825.43          |
| AAEL020314 | 177.40             | 353.76          |
| AAEL026174 | 49034.14           | 55193.21        |
| AAEL025109 | 0.00               | 0.00            |

\*Each value is the average of 15 individual midguts of Puerto Rico mosquito strain [3].

**(B) Fold change of genes that demonstrate high differential expression in the midgut post-CHIKV infection**

| CHIKV      | Down (D)    |
|------------|-------------|
| AAEL001650 | D to zero   |
| AAEL001654 | D to zero   |
| AAEL006854 | D to zero   |
| AAEL012064 | 1.9x        |
| AAEL004120 | 1.7x        |
|            | Up (U)      |
| AAEL009555 | U from zero |
| AAEL020314 | 2.0x        |
| AAEL007591 | 1.5x        |
| AAEL015137 | 1.5x        |
| AAEL009760 | 1.4x        |

D, shut down to Zero expression.

U, initiation of expression from Zero.

**(C) Differential expression of genes in the midgut infected with DENV1**

|            | Control MG Day 4 # | DENV1 MG 4-dpi# |
|------------|--------------------|-----------------|
| AAEL001634 | 0.00               | 0.00            |
| AAEL001650 | 1184.16            | 0.00            |
| AAEL001654 | 320.44             | 0.00            |
| AAEL004120 | 195.74             | 18.35           |
| AAEL006854 | 717.35             | 50.13           |
| AAEL007591 | 252027.37          | 3303.94         |
| AAEL007592 | 3021.88            | 1751.66         |
| AAEL009553 | 0.00               | 0.00            |
| AAEL009555 | 0.00               | 0.00            |
| AAEL009556 | 12447.31           | 555.57          |
| AAEL009760 | 166901.01          | 2432057.66      |
| AAEL009956 | 161.41             | 0.00            |
| AAEL012064 | 4131.45            | 1020.92         |
| AAEL015136 | 1997498.04         | 36507.28        |
| AAEL015137 | 5564.54            | 73.46           |
| AAEL015139 | 0.00               | 0.00            |
| AAEL015140 | 1776.92            | 72.41           |
| AAEL020314 | 4304.39            | 927.46          |
| AAEL026174 | 35249.04           | 3925.39         |
| AAEL025109 | 0.00               | 0.00            |

#Each value is the average of 45 individual midguts of Thailand mosquito strain [4].

**(D) Fold change of genes that demonstrate high differential expression in the midgut post-DENV1 infection**

| DENV1      | Down (D)  |
|------------|-----------|
| AAEL001650 | D to zero |
| AAEL001654 | D to zero |
| AAEL009956 | D to zero |
| AAEL007591 | 76.3x     |
| AAEL015137 | 75.7x     |
| AAEL015136 | 54.7x     |
| AAEL015140 | 24.5x     |
| AAEL009556 | 22.4x     |
| AAEL006854 | 14.3x     |
| AAEL004120 | 10.7x     |
| AAEL026174 | 9.0x      |
| AAEL020314 | 4.6x      |
| AAEL012064 | 4.0x      |
| AAEL007592 | 1.7x      |
|            | Up        |
| AAEL009760 | 14.6x     |

D, shut down to Zero expression.

U, initiation of expression from Zero.

**(E) Differential expression of genes in the midgut infected with DENV2**

|            | Control MG Day 14§ | DENV2 MG 14-dpi§ |
|------------|--------------------|------------------|
| AAEL001634 | 0.00               | 0.00             |
| AAEL001650 | 194.51             | 340.78           |
| AAEL001654 | 0.00               | 0.00             |
| AAEL004120 | 659.59             | 342.40           |
| AAEL006854 | 716.79             | 1171.94          |
| AAEL007591 | 712972.49          | 623372.81        |
| AAEL007592 | 87141.99           | 61405.28         |
| AAEL009553 | 0.00               | 0.00             |
| AAEL009555 | 183.64             | 0.00             |
| AAEL009556 | 17460.29           | 14094.82         |
| AAEL009760 | 664926.92          | 822380.22        |
| AAEL009956 | 844.64             | 696.38           |
| AAEL012064 | 2686.99            | 1113.14          |
| AAEL015136 | 888536.30          | 856842.53        |
| AAEL015137 | 9351.43            | 10471.88         |
| AAEL015139 | 1142.74            | 1048.72          |
| AAEL015140 | 190.45             | 524.32           |
| AAEL020314 | 473.57             | 67.46            |
| AAEL026174 | 21863.03           | 17614.21         |
| AAEL025109 | 0.00               | 0.00             |

§Each value is the average of 10 individual midguts of Mexico mosquito strain [5].

**(F) Fold change of genes that demonstrate high differential expression in the midgut post-DENV2 infection**

| DENV2      | Down (D)  |
|------------|-----------|
| AAEL009555 | D to zero |
| AAEL020314 | 7.0x      |
| AAEL012064 | 2.4x      |
| AAEL004120 | 1.9x      |
| AAEL007592 | 1.4x      |
|            | Up        |
| AAEL015140 | 2.8x      |
| AAEL001650 | 1.8x      |
| AAEL006854 | 1.6x      |
| AAEL009760 | 1.2x      |

D, shut down to Zero expression.

U, initiation of expression from Zero.

**Table S5. Differential expression in salivary glands infected with CHIKV, DENV2 and ZIKV**

**(A) Differential expression of genes in the salivary gland infected with CHIKV**

|            | Control SG Day 7* | CHIKV SG 7-dpi* |
|------------|-------------------|-----------------|
| AAEL001634 | 1.04              | 0.00            |
| AAEL001650 | 0.45              | 5.54            |
| AAEL001654 | 0.00              | 0.00            |
| AAEL004120 | 277.74            | 272.52          |
| AAEL006854 | 7.29              | 6.69            |
| AAEL007591 | 0.45              | 0.00            |
| AAEL007592 | 0.00              | 0.00            |
| AAEL009553 | 0.00              | 0.00            |
| AAEL009555 | 0.00              | 0.00            |
| AAEL009556 | 0.45              | 0.00            |
| AAEL009760 | 1.94              | 1.41            |
| AAEL009956 | 0.00              | 0.00            |
| AAEL012064 | 112.44            | 84.78           |
| AAEL015136 | 0.35              | 0.00            |
| AAEL015137 | 0.00              | 0.00            |
| AAEL015139 | 0.00              | 0.00            |
| AAEL015140 | 0.00              | 0.00            |

\* Each value is the average of two independent sets of 20 pairs of salivary glands [6].  
 §Performed on two independent days [6].

**(B) Fold change of genes that demonstrate high differential expression in the salivary gland post-CHIKV infection**

| CHIKV      | Down (D)  |
|------------|-----------|
| AAEL001634 | D to zero |
| AAEL007591 | D to zero |
| AAEL009760 | 1.4x      |
| AAEL012064 | 1.3x      |
| AAEL006854 | 1.1x      |
| AAEL004120 | 1.0x      |
| AAEL001650 | 12.3x     |

D, shut down to Zero expression.  
 U, initiation of expression from Zero.



**(C) Differential expression of genes in the salivary gland infected with DENV2**

|            | Control SG Day 14* | DENV2 SG 14-dpi * |
|------------|--------------------|-------------------|
| AAEL001634 | 1.69               | 0.48              |
| AAEL001650 | 0.93               | 4.72              |
| AAEL001654 | 0.00               | 0.00              |
| AAEL004120 | 323.26             | 195.34            |
| AAEL006854 | 14.01              | 5.09              |
| AAEL007591 | 0.55               | 0.00              |
| AAEL007592 | 0.00               | 0.00              |
| AAEL009553 | 0.76               | 0.00              |
| AAEL009555 | 0.38               | 0.48              |
| AAEL009556 | 0.38               | 2.43              |
| AAEL009760 | 5.75               | 5.69              |
| AAEL009956 | 0.00               | 0.00              |
| AAEL012064 | 186.06             | 126.29            |
| AAEL015136 | 0.93               | 0.00              |
| AAEL015137 | 0.55               | 0.00              |
| AAEL015139 | 0.00               | 0.00              |
| AAEL015140 | 0.00               | 0.00              |

\* Each value is the average of two independent sets of 20 pairs of salivary glands [6].  
 §Performed on two independent days [6].

**(D) Fold change of genes that demonstrate high differential expression in the salivary gland post-DENV2 infection**

| DENV2      | Down (D)  |
|------------|-----------|
| AAEL007591 | D to zero |
| AAEL009553 | D to zero |
| AAEL015136 | D to zero |
| AAEL015137 | D to zero |
| AAEL001634 | 3.5x      |
| AAEL006854 | 2.8x      |
| AAEL004120 | 1.7x      |
| AAEL012064 | 1.5x      |
|            | Up        |
| AAEL009556 | 6.4x      |
| AAEL001650 | 5.1x      |
| AAEL009555 | 1.3x      |

D, shut down to Zero expression.

U, initiation of expression from Zero.

**(E) Differential expression of genes in the salivary gland infected with ZIKV**

|            | Control SG Day 14* | ZIKV SG 14-dpi* |
|------------|--------------------|-----------------|
| AAEL001634 | 1.91               | 1.40            |
| AAEL001650 | 1.05               | 1.40            |
| AAEL001654 | 0.00               | 0.00            |
| AAEL004120 | 364.30             | 394.85          |
| AAEL006854 | 15.79              | 24.11           |
| AAEL007591 | 0.62               | 1.61            |
| AAEL007592 | 0.00               | 4.29            |
| AAEL009553 | 0.86               | 0.00            |
| AAEL009555 | 0.43               | 0.00            |
| AAEL009556 | 0.43               | 0.00            |
| AAEL009760 | 6.49               | 2.47            |
| AAEL009956 | 0.00               | 0.00            |
| AAEL012064 | 209.75             | 129.77          |
| AAEL015136 | 1.05               | 1.07            |
| AAEL015137 | 0.62               | 0.00            |
| AAEL015139 | 0.00               | 0.00            |
| AAEL015140 | 0.00               | 0.00            |

\* Each value is the average of two independent sets of 20 pairs of salivary glands [6].  
 §Performed on two independent days [6].

**(F) Fold change of genes that demonstrate high differential expression in the salivary gland post-ZIKV infection**

| ZIKV       | Down (D)    |
|------------|-------------|
| AAEL009553 | D to zero   |
| AAEL009555 | D to zero   |
| AAEL009556 | D to zero   |
| AAEL015137 | D to zero   |
| AAEL009760 | 2.6x        |
| AAEL012064 | 1.6x        |
| AAEL001634 | 1.4x        |
|            | Up (U)      |
| AAEL007592 | U from zero |
| AAEL007591 | 2.6x        |
| AAEL006854 | 1.5x        |
| AAEL001650 | 1.3x        |

D, shut down to Zero expression.

U, initiation of expression from Zero.

## References

- [1] B. J. Matthews, C. S. McBride, M. DeGennaro, O. Despo, and L. B. Vosshall, "The neurotranscriptome of the *Aedes aegypti* mosquito," *BMC Genomics*, vol. 17, no. 1, Jan. 2016, doi: 10.1186/s12864-015-2239-0.
- [2] M. Bonizzoni *et al.*, "RNA-seq analyses of blood-induced changes in gene expression in the mosquito vector species, *Aedes aegypti*," *BMC Genomics*, vol. 12, Jan. 2011, doi: 10.1186/1471-2164-12-82.
- [3] S. Dong, S. K. Behura, and A. W. E. Franz, "The midgut transcriptome of *Aedes aegypti* fed with saline or protein meals containing chikungunya virus reveals genes potentially involved in viral midgut escape," *BMC Genomics*, vol. 18, no. 1, May 2017, doi: 10.1186/s12864-017-3775-6.
- [4] V. Raquin *et al.*, "Individual co-variation between viral RNA load and gene expression reveals novel host factors during early dengue virus infection of the *Aedes aegypti* midgut," *PLoS Neglected Tropical Diseases*, vol. 11, no. 12, Dec. 2017, doi: 10.1371/journal.pntd.0006152.
- [5] M. Bonizzoni, W. A. Dunn, C. L. Campbell, K. E. Olson, O. Marinotti, and A. A. James, "Complex Modulation of the *Aedes aegypti* Transcriptome in Response to Dengue Virus Infection," *PLoS ONE*, vol. 7, no. 11, Nov. 2012, doi: 10.1371/journal.pone.0050512.
- [6] A. Chowdhury *et al.*, "JNK pathway restricts DENV2, ZIKV and CHIKV infection by activating complement and apoptosis in mosquito salivary glands," *PLoS Pathogens*, vol. 16, no. 8, Aug. 2020, doi: 10.1371/journal.ppat.1008754.
